# Supplementary material for: Structural studies on dicopper(ii) compounds with catechol oxidase activity
Source: Royal Society of Chemistry journal article supplement (doi:10.1039/b008714i), 2001-01-01
Supplement: b008714i.doc [file b008714i.doc]

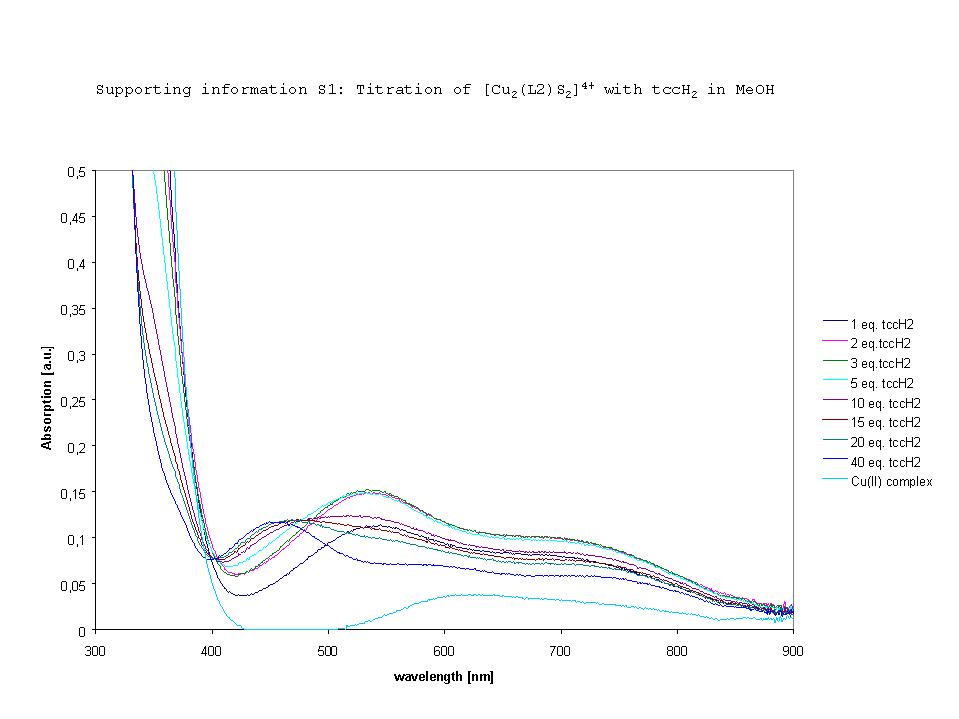

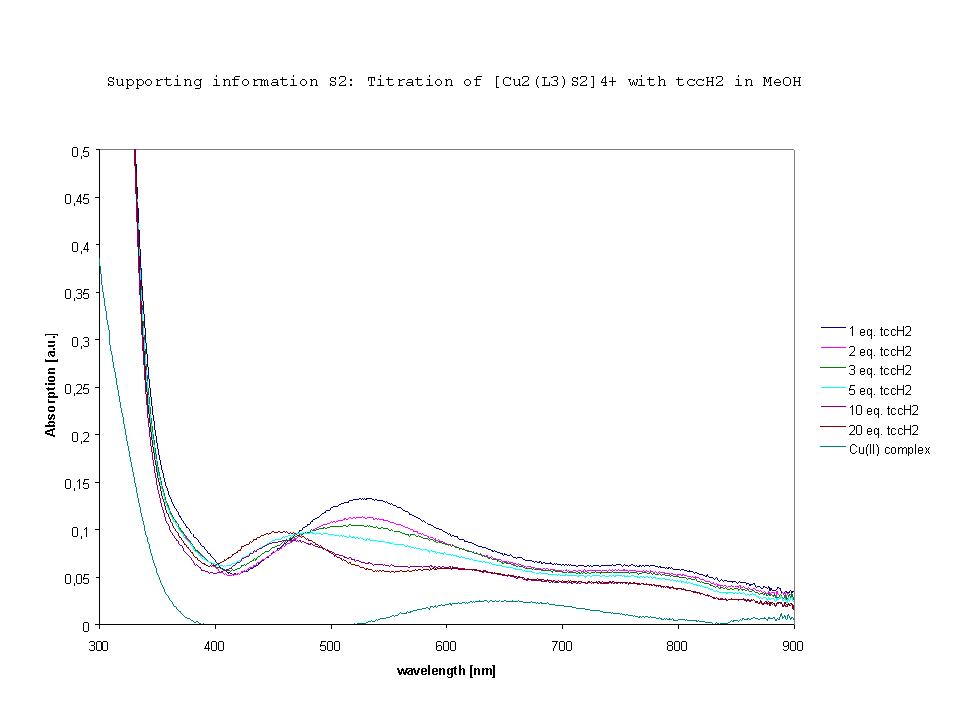


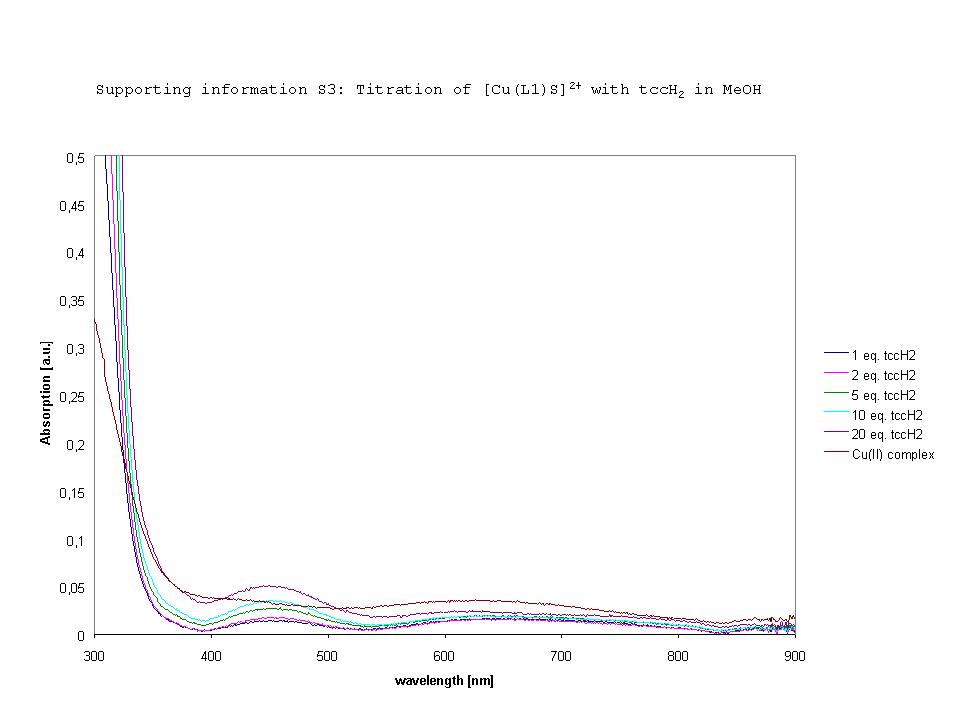


Supporting Information S4:

**Experimental**

The ligands were prepared as reported earlier1,2 (**1**): [Cu(CH3CN)4](BF4)3(150mg, 0.46mmol) was added slowly to a suspension of L1 (200mg, 0.46mmol) in CH3CN (4ml). The resulting yellow solution was oxygenated at –40°C for 20min. After purging with N2 tccH2xH2O (122mg, 0.46mmol) was added to the solution. Green single crystals were obtained after 2 d (Et2O diffusion bath, rt; 273mg,68%). FT-IR (KBr) cm-1 2958(s), 1734 (C=O(ester)), 1608 (C=N(py)), 1460 (C-O), 1450 (C-O), 1390 (C-C(ar)). UV-Vis (CH3CN), max () [nm](lmol-1cm-1) 315 (2826), 371 (386, sh), 451 (512), 614 (183), 733 (159). Calc. for CuC29H31N4O9Cl4BF4, 871.75 (found): C 39.96 (40.15), H 3.58 (3.53), N 6.43 (6.72). (**2**): Cu(ClO4)2x6H2O (85mg, 0.23mmol) in CH3CN (1ml) was added to a suspension of L1 (200mg, 0.46mmol) in CH3CN (1ml), followed by tccH2xH2O (61 mg, 0.23mmol) in CH3CN (0.5ml). After addition of triethylamin (0.066ml, 0.46mmol, 10min), a red precipitate was filtered off the solution(108mg, 60%). Burgundy-red crystals were obtained upon slow evaporation of the solvent when a substoichiometric amount of triethylamin was used. UV-Vis (CH3CN), max () [nm](lmol-1cm-1) 334 (3168), 516 (131), 677 (93). FT-IR (KBr) [cm-1] 1732 (C=O(ester)), 1606 (C=N(py)), 1437 (C-O), 1370 (C-C(ar)). Calc for CuC29H30N4O9Cl4, 783.94 (found): C 44.43 (44.75), H 3.86 (4.24), N 7.15 (N 7.37), Cl 18.09 (18.48). *[Cu2(L2)(tcc)](BF4)2x2H2O*: [Cu(CH3CN)4] (BF4)2 (144mg, 0.44mmol) was added slowly to a suspension of L2 (200mg, 0.22mmol) in CH3CN (4ml), followed by addition of tcbq (60mg, 0.22mmol). The product was isolated after addition of Et2O (20ml) as a deep violet powder (167mg, 53%). UV-Vis (CH3CN), max () [nm](lmol-1cm-1) 303 (9600), 364 (3290), 418 (1100), 528 (2430), 700 (1428). Calc. for Cu2C52H54N8O14B2Cl4F8, 1457.56 (found): C 42.85 (42.45), H 3.73 (4.23), N 7.69 (7.65). (**3**): As for [Cu2(L2)(tcc)](BF4)2x2H2O, with [Cu(CH3CN)4](BF4)2 (71mg, 0.22mmol), L3 (100mg, 0.11mmol) and tcbq (30mg, 0.11mmol) in CH3CN (2ml). Violet crystals were isolated after 1d (110mg, 66%). Alternative: as for [Cu(L1)(tcc)]x2H2O with Cu(ClO4)2x6H2O (82 %). FT-IR (KBr) [cm-1]: 2954 (w), 1734 (C=O(ester)), 1608 (C=N(py)), 1450 (C-O), 1374 (C-C(ar)), 1056 (ClO4). UV-Vis (CH3CN): max () [nm](lmol-1cm-1] : 335 (3831), 395 (1010, sh),538 (1900), 801 (838). Calc. for Cu2C53H58N8O23Cl6, 1514.89 (found): C 42.02 (42.07), H 3.86 (4.16), N 7.40 (7.88). (**4**): Preparation as for [Cu(L1)(tcc)] x 2 H2O (**2**), with Cu(ClO4)2 x 6 H2O (163 mg, 0.44 mmol) and L4 (200 mg, 0.23 mmol) in CH3CN (4 ml). Blue-green crystals were isolated after 2 d (ether diffusion, r.t.) (73.9%). FT-IR (KBr) [cm-1]: 2952 (w), 1740 (C=O(ester)), 1608 (C=N(py)), 1452 (C-O), 1374 (C-C(ar)), 1256 (s), 806(m), 788 (m). UV-Vis (CH3CN): max () [nm] (lmol-1cm-1): 338 (3299), 488 (371), 612 (313). Calc. for Cu2C59H52N8O14Cl8, 1507.82 (found): C 46.99 (46.52), H 3.48 (3.72), N 7.43 (7.33).

[1] H. Börzel, P. Comba, C. Katsichtis, W. Kiefer, A. Lienke, V. Nagel, H. Pritzkow, *Chem. Eur. J. 5* (1999) 1716.

[2] U. Holzgrabe, E. Erciyas, *Arch. Pharm. 325* (1992) 657.

[3] G.J. Kubas, *Inorg. Synth.* **1979**, *19*, 90.
